# Supplementary material for: Engineering a Lactobacillus Lysine Riboswitch to Dynamically Control Metabolic Pathways for Lysine Production in Corynebacterium glutamicum
Source: MDPI journal article supplement (doi:10.3390/microorganisms12030606), 2024-03-18
Supplement: s1 [file s1]

## Supplementary Information

Table S1. Bacterial strains and plasmids used in this study.

| Strains or plasmids  | Relevant characteristics <sup>a</sup>                                                                                                                                                                                                                  | Source or reference |
|----------------------|--------------------------------------------------------------------------------------------------------------------------------------------------------------------------------------------------------------------------------------------------------|---------------------|
| <b>Strains</b>       |                                                                                                                                                                                                                                                        |                     |
| <i>E. coli</i>       |                                                                                                                                                                                                                                                        |                     |
| DH5 $\alpha$         | F <sup>-</sup> <i>endA1 glnV44 thi-1 recA1 relA1 gyrA96 deoR nupG purB20 <math>\phi</math>80dlacZ<math>\Delta</math>M15 <math>\Delta</math>(lacZYA-argF)U169, hsdR17(<i>r</i>K<sup>-</sup><i>m</i>K<sup>+</sup>), <math>\lambda</math><sup>-</sup></i> | Lab collection      |
| DH-26                | DH5 $\alpha$ pLPRS-RFP                                                                                                                                                                                                                                 | This study          |
| DH-31                | DH5 $\alpha$ pLPRS-tetA-RFP                                                                                                                                                                                                                            | This study          |
| <i>C. glutamicum</i> |                                                                                                                                                                                                                                                        |                     |
| ATCC 13032           | Wild-type strain                                                                                                                                                                                                                                       | Lab collection      |
| QW36                 | pEC-A263-RFP, derived from ATCC 13032                                                                                                                                                                                                                  | This study          |
| QW37                 | pEC-R152-RFP, derived from ATCC 13032                                                                                                                                                                                                                  | This study          |
| QW45                 | <i>lysC</i> (Q298G), derived from ATCC 13032                                                                                                                                                                                                           | This study          |
| QW48                 | LPRS-A263- <i>lysC</i> , derived from QW45                                                                                                                                                                                                             | This study          |
| QW53                 | LPRS-R152-hom, derived from QW45                                                                                                                                                                                                                       | This study          |
| QW54                 | LPRS-R357-hom, derived from QW45                                                                                                                                                                                                                       | This study          |
| QW55                 | LPRS-A263- <i>lysC</i> , LPRS-R357-hom, derived from QW45                                                                                                                                                                                              | This study          |
| <b>Plasmids</b>      |                                                                                                                                                                                                                                                        |                     |
| pAmp-Ori             | Cloning vector                                                                                                                                                                                                                                         | Lab collection      |
| pJ-RFP               | Expression vector                                                                                                                                                                                                                                      | Lab collection      |
| pK18mobsacB          | Kan <sup>R</sup> , SacB                                                                                                                                                                                                                                | Lab collection      |
| pEC-XK99E            | Expression vector                                                                                                                                                                                                                                      | Lab collection      |
| pLPRS-RFP            | BBa_J23100, <i>Lb. plantarum</i> lysine riboswitch (LPRS), RFP                                                                                                                                                                                         | This study          |
| pG14A-RFP            | LPRS (G14A), derived from pLPRS-RFP                                                                                                                                                                                                                    | This study          |
| pLPRS-tetA-RFP       | tetA, derived from pLPRS-RFP                                                                                                                                                                                                                           | This study          |
| pEC-A263-RFP         | LPRS-A263 fused with <i>RFP</i> gene, derived from pEC-XK99E                                                                                                                                                                                           | This study          |
| pEC-R152-RFP         | LPRS-R152 fused with <i>RFP</i> gene, derived from pEC-XK99E                                                                                                                                                                                           | This study          |
| pA263- <i>lysC</i>   | LPRS-A263 fused with <i>lysC</i> gene, derived from pK18mobsacB                                                                                                                                                                                        | This study          |
| pR152-hom            | LPRS-R152 fused with <i>hom</i> gene, derived from pK18mobsacB                                                                                                                                                                                         | This study          |
| pR357-hom            | LPRS-R357 fused with <i>hom</i> gene, derived from pK18mobsacB                                                                                                                                                                                         | This study          |

Table S2. Primers used in this study.

| Primer  | Sequence                                                 | Description                                  |
|---------|----------------------------------------------------------|----------------------------------------------|
| LPRS-F  | atcgaaagaagaggatgcg                                      | For <i>Lb. plantarum</i> lysine              |
| LPRS-R  | ctgccattgcagaaacctcc                                     | riboswitch amplification                     |
| RFP-F   | atggcttctccgaagac                                        | For <i>RFP</i> amplification                 |
| RFP-R   | ttaagcaccgggtggagtgc                                     |                                              |
| BR-F    | agtagctagcactgtacctag                                    | For backbone of pJ-RFP                       |
| BR-R    | gatgctgaaaagaacgccg                                      | amplification                                |
| tetA-F  | atgcaagtcgacctgctgg                                      | For <i>tetA</i> amplification                |
| tetA-R  | cctctccagatcctcctccagatccacctccaagggtcgag<br>gtggccccggc |                                              |
| RSlib-F | NNNNNNNNNNNNNNNNNNNNgaaatcat<br>gctgaaaagaacg            | For pLPRS-tetA-RFP<br>amplification          |
| RSlib-R | NNNNNNNNNNNNNNNNNNNNcctcttcttt<br>cgatataactcaac         |                                              |
| lysC-F  | aggtggccctggctgtacag                                     | For <i>lysC</i> amplification                |
| lysC-R  | cttttagcgtccggtgcctgc                                    |                                              |
| hom-F   | atcatgacctcagcatctgc                                     | For <i>hom</i> amplification                 |
| hom-R   | attagtcctttcgaggcgg                                      |                                              |
| K18-F   | GGATCCCCTGACACGAGGTAGTTatgacc<br>tcagcatctgccccaaag      | For backbone of<br>pK18mobsacB amplification |
| K18-R   | GGCCTGCGCTAGCGCAGGTAGTACctatt<br>actttgttcggccaccc       |                                              |

Table S3. Predicted results of lysine riboswitch in *C. glutamicum* ATCC 13032 using Riboswitch Scanner.

| Genome_ID   | Genome_Name                           | Taxonomy_name  |        | Riboswitch Location | Riboswitch Strand | Riboswitch class | Downstream gene location |
|-------------|---------------------------------------|----------------|--------|---------------------|-------------------|------------------|--------------------------|
| NC_003450.3 | Corynebacterium glutamicum ATCC 13032 | Actinobacteria | 201174 | 66279-66442         | -                 | FMN              | 65504-66197              |
| NC_003450.3 | Corynebacterium glutamicum ATCC 13032 | Actinobacteria | 201174 | 554235-554393       | -                 | cobalamin        | 552944-554129            |
| NC_003450.3 | Corynebacterium glutamicum ATCC 13032 | Actinobacteria | 201174 | 741074-741181       | -                 | TPP              | 740224-741016            |
| NC_003450.3 | Corynebacterium glutamicum ATCC 13032 | Actinobacteria | 201174 | 868388-868556       | -                 | ydaO-yuaA        | 867799-868381            |
| NC_003450.3 | Corynebacterium glutamicum ATCC 13032 | Actinobacteria | 201174 | 1126306-1126415     | +                 | TPP              | 1127012-1128353          |
| NC_003450.3 | Corynebacterium glutamicum ATCC 13032 | Actinobacteria | 201174 | 1371634-1371746     | -                 | TPP              | 1369550-1369877          |
| NC_003450.3 | Corynebacterium glutamicum ATCC 13032 | Actinobacteria | 201174 | 1372540-1372656     | +                 | SAM-IV           | 1372804-1373134          |
| NC_003450.3 | Corynebacterium glutamicum ATCC 13032 | Actinobacteria | 201174 | 1542916-1543023     | -                 | TPP              | 1539816-1542108          |
| NC_003450.3 | Corynebacterium glutamicum ATCC 13032 | Actinobacteria | 201174 | 2150221-2150334     | +                 | TPP              | 2150334-2151000          |
| NC_003450.3 | Corynebacterium glutamicum ATCC 13032 | Actinobacteria | 201174 | 2320608-2320796     | -                 | ydaO-yuaA        | 2319965-2320595          |

Table S4. Predicted results of lysine riboswitch in *Lb. plantarum* WCFS1 13032 using Riboswitch Scanner.

| Genome_ID   | Genome_Name                   | Taxonomy_name |      | Riboswitch Location | Riboswitch Strand | Riboswitch class | Downstream gene location |
|-------------|-------------------------------|---------------|------|---------------------|-------------------|------------------|--------------------------|
| NC_004567.2 | Lactobacillus plantarum WCFS1 | Firmicutes    | 1239 | 99249-99354         | +                 | TPP              | 99432-100224             |
| NC_004567.2 | Lactobacillus plantarum WCFS1 | Firmicutes    | 1239 | 202607-202700       | -                 | TPP              | 201934-202504            |
| NC_004567.2 | Lactobacillus plantarum WCFS1 | Firmicutes    | 1239 | 482228-482273       | +                 | PreQ1            | 482281-482788            |
| NC_004567.2 | Lactobacillus plantarum WCFS1 | Firmicutes    | 1239 | 761448-761599       | +                 | glmS             | 761631-763449            |
| NC_004567.2 | Lactobacillus plantarum WCFS1 | Firmicutes    | 1239 | 928916-929097       | +                 | lysine           | 929240-930692            |
| NC_004567.2 | Lactobacillus plantarum WCFS1 | Firmicutes    | 1239 | 1189828-1189933     | +                 | SMK_box          | 1191254-1192757          |
| NC_004567.2 | Lactobacillus plantarum WCFS1 | Firmicutes    | 1239 | 1705901-1706022     | -                 | FMN              | 1705192-1705777          |
| NC_004567.2 | Lactobacillus plantarum WCFS1 | Firmicutes    | 1239 | 1741167-1741232     | -                 | fluoride         | 1739825-1741115          |

|             |                                     |            |      |                     |   |        |                     |
|-------------|-------------------------------------|------------|------|---------------------|---|--------|---------------------|
|             |                                     |            |      |                     |   |        |                     |
| NC_004567.2 | Lactobacillus<br>plantarum<br>WCFS1 | Firmicutes | 1239 | 1874486-<br>1874649 | - | ykoK   | 1872642-<br>1874385 |
| NC_004567.2 | Lactobacillus<br>plantarum<br>WCFS1 | Firmicutes | 1239 | 2410476-<br>2410574 | + | purine | 2410633-<br>2411974 |
| NC_004567.2 | Lactobacillus<br>plantarum<br>WCFS1 | Firmicutes | 1239 | 2519515-<br>2519559 | - | PreQ1  | 2518513-<br>2519494 |
| NC_004567.2 | Lactobacillus<br>plantarum<br>WCFS1 | Firmicutes | 1239 | 2968731-<br>2968829 | - | purine | 2966961-<br>2968653 |

Table S5. The sequences of the engineered *Lb. plantarum* lysine riboswitches.

| Engineered LPRS clone | Sequence                  |
|-----------------------|---------------------------|
| Lysine-activated      |                           |
| 4                     | cccgtgagacggctgtagcacc    |
| 17                    | gtgagcgaacatatgatacatcgg  |
| 29                    | gtacaccgcacaccagcagcttg   |
| 53                    | ggtgtgacacgggtcacc        |
| 124                   | gaggccggcacagagtgtctcg    |
| 171                   | tcgcgtctggtgattgatgtctctg |
| 192                   | gaccggcgtaagctcgagatagt   |
| 209                   | cgggtgagcgggtgtatatgcaag  |
| 263                   | acgatacgtcgcgcagtgtgga    |
| 284                   | gctggaccgctccatctgcggac   |
| Lysine-repressed      |                           |
| 31                    | cgtcaggtctccgatgagtcg     |
| 46                    | agggctgtactcgattcgg       |
| 61                    | tctacgtgaagcattctggaagatg |
| 84                    | gaccacatgcgatgactcagcag   |
| 139                   | ctcccgaatgattgcaatagg     |
| 152                   | tgactggtctatcaggctgtacg   |
| 217                   | ccgcatcgccgtaggtggcag     |
| 298                   | catcagccagttggcttgcgt     |
| 314                   | aggcacgcaccgttagcgcgcg    |
| 352                   | tccagtgcagtgttgagatatgtc  |
